# Supplementary material for: Differential Clinical Outcomes Between Angiographic Complete Versus Incomplete Coronary Revascularization, According to the Presence of Chronic Kidney Disease in the Drug‐Eluting Stent Era
Source: PubMed Central journal article supplement — J Am Heart Assoc. 2018 Feb 15;7(4):e007962. doi: 10.1161/JAHA.117.007962 (PMC5850202; doi:10.1161/jaha.117.007962), 2018-02-15
Supplement: JAH3-7-e007962-s001.pdf [file JAH3-7-e007962-s001.pdf]

# **Supplementary Appendix**

## **Differential Clinical Outcomes Between Angiographic Complete versus Incomplete Coronary Revascularization, According to the Presence of Chronic Kidney Disease in The Drug-Eluting Stent Era**

Jihoon Kim, MD<sup>a</sup>, Joo Myung Lee, MD, MPH, PhD<sup>a</sup>, Ki Hong Choi, MD<sup>a</sup>, Tae-Min Rhee, MD<sup>b</sup>, Doyeon Hwang, MD<sup>c</sup>, Jonghanne Park, MD, PhD<sup>d</sup>, Chul Ahn, PhD<sup>c</sup>, Taek Kyu Park, MD<sup>a</sup>, Jeong Hoon Yang, MD, PhD<sup>a</sup>, Young Bin Song, MD, PhD<sup>a</sup>, Jin-Ho Choi, MD, PhD<sup>c</sup>, Joo-Yong Hahn, MD, PhD<sup>a</sup>, Seung-Hyuk Choi, MD, PhD<sup>a</sup>, Hyeon-Cheol Gwon, MD, PhD<sup>a</sup>

### **Table of contents of the supplementary appendix:**

- **Supplementary Tables**
- **Supplementary Figures and Figure Legends**

**Supplementary Table 1. Baseline Characteristics According to Complete Revascularization and Chronic Kidney Disease, After Adjustment with Using Stabilized Inverse Probability of Treatment Weight**

|                                 | CKD group<br>(929 patients) |               |         |            | Non-CKD group<br>(2295 patients) |               |         |            |
|---------------------------------|-----------------------------|---------------|---------|------------|----------------------------------|---------------|---------|------------|
|                                 | IR<br>(N=736)               | CR<br>(N=193) | P value | SMD<br>(%) | IR<br>(N=1648)                   | CR<br>(N=647) | P value | SMD<br>(%) |
| <b>Demographics</b>             |                             |               |         |            |                                  |               |         |            |
| Age, yrs                        | 68.7 ± 9.6                  | 67.8 ± 9.4    | 0.397   | -8.4       | 62.1 ± 10.5                      | 61.6 ± 10.5   | 0.674   | -2.3       |
| Male                            | 65.0 %                      | 67.0 %        | 0.698   | 4.1        | 77.8 %                           | 76.6 %        | 0.614   | -2.9       |
| <b>Coexisting condition</b>     |                             |               |         |            |                                  |               |         |            |
| Diabetes mellitus               | 22.0 %                      | 22.4 %        | 0.924   | 1.0        | 19.8 %                           | 20.0 %        | 0.934   | 0.5        |
| Hypertension                    | 76.6 %                      | 77.6 %        | 0.827   | 2.2        | 55.1 %                           | 53.9 %        | 0.672   | -2.4       |
| Dyslipidemia                    | 28.6 %                      | 28.8 %        | 0.962   | 0.5        | 29.1 %                           | 28.5 %        | 0.829   | -1.2       |
| Peripheral vascular disease     | 4.5 %                       | 4.2 %         | 0.881   | -1.3       | 1.2 %                            | 0.7 %         | 0.346   | -4.8       |
| <b>Renal function</b>           |                             |               |         |            |                                  |               |         |            |
| Creatinine, mg/dl               | 2.1 ± 2.0                   | 2.2 ± 2.1     | 0.559   | 5.7        | 0.9 ± 0.2                        | 0.9 ± 0.2     | 0.987   | -0.1       |
| eGFR, ml/min/1.73m <sup>2</sup> | 42.0 ± 16.2                 | 41.6 ± 17.4   | 0.749   | -3.5       | 81.0 ± 16.6                      | 81.1 ± 20.2   | 0.869   | 0.9        |
| CKD stage*                      |                             |               | 0.766   | 11.0       |                                  |               | NA      | NA         |
| Mild                            | 56.7 %                      | 56.4 %        |         |            | NA                               | NA            |         |            |
| Moderate                        | 20.9 %                      | 17.5 %        |         |            | NA                               | NA            |         |            |
| Severe                          | 18.5 %                      | 22.1 %        |         |            | NA                               | NA            |         |            |
| ESRD                            | 3.9 %                       | 4.0 %         |         |            | NA                               | NA            |         |            |
| <b>Cardiac risk factors</b>     |                             |               |         |            |                                  |               |         |            |
| Current smoker                  | 13.5 %                      | 12.7 %        | 0.817   | -2.5       | 20.5 %                           | 21.8 %        | 0.557   | 3.2        |
| Previous CVA                    | 10.1 %                      | 9.2 %         | 0.759   | -3.1       | 4.1 %                            | 3.7 %         | 0.684   | -2.0       |
| Previous MI                     | 26.3 %                      | 28.7 %        | 0.627   | 5.6        | 20.7 %                           | 20.2 %        | 0.835   | -1.2       |
| Previous PCI                    | 16.9 %                      | 16.0 %        | 0.835   | -2.2       | 11.8 %                           | 11.3 %        | 0.777   | -1.6       |
| LVEF <sup>†</sup> , %           | 56.3 ± 13.4                 | 55.1 ± 14.4   | 0.966   | -0.5       | 60.1 ± 10.7                      | 60.4 ± 10.4   | 0.890   | 0.9        |
| Clinical diagnosis              |                             |               | 0.499   | 11.6       |                                  |               | 0.957   | 1.7        |
| AMI                             | 28.2 %                      | 33.5 %        |         |            | 23.1 %                           | 23.8 %        |         |            |
| Unstable angina                 | 17.7 %                      | 15.8 %        |         |            | 19.6 %                           | 19.1 %        |         |            |
| Stable angina                   | 54.1 %                      | 50.7 %        |         |            | 57.3 %                           | 57.1 %        |         |            |
| <b>Complexity of CAD</b>        |                             |               |         |            |                                  |               |         |            |
| SYNTAX score < 12               | 25.7 %                      | 26.2 %        | 0.902   | 1.0        | 30.0 %                           | 30.4 %        | 86.3    | 0.9        |
| <b>Treatment of CAD</b>         |                             |               |         |            |                                  |               |         |            |
| Left main coronary artery       | 7.5 %                       | 7.5 %         | 0.997   | 0.1        | 8.3 %                            | 8.7 %         | 0.773   | 1.4        |

|                                       |        |        |       |      |        |        |       |     |
|---------------------------------------|--------|--------|-------|------|--------|--------|-------|-----|
| At least 1 bifurcation lesion         | 23.1 % | 21.0 % | 0.571 | -5.1 | 28.2 % | 28.7 % | 0.837 | 1.1 |
| At least 1 ostial lesion              | 10.0 % | 10.0 % | 0.990 | 0.1  | 12.5 % | 12.6 % | 0.933 | 0.4 |
| At least 1 CTO lesion                 | 14.0 % | 17.7 % | 0.355 | 10.2 | 17.2 % | 17.8 % | 0.787 | 1.5 |
| At least 1 type B2/C lesion           | 66.4 % | 68.0 % | 0.750 | 3.4  | 67.8 % | 68.7 % | 0.736 | 1.9 |
| Type of inserted stent <sup>‡</sup>   |        |        | 0.879 | 5.0  |        |        | 0.886 | 2.8 |
| 1 <sup>st</sup> generation stent only | 60.2%  | 59.6%  |       |      | 44.9   | 46.0   |       |     |
| 2 <sup>nd</sup> generation stent only | 34.3%  | 35.9%  |       |      | 50.7   | 49.3   |       |     |
| Other                                 | 5.5%   | 4.6%   |       |      | 4.4    | 4.7    |       |     |

Values are mean  $\pm$  SD or n/N% adjusted by stabilized IPTW (inverse probability of treatment weight) using entire variables in supplementary table 1.

\* CKD was divided into 4 stages using MDRD (Modification of Diet in Renal Disease) study equation; mild ( $45 \leq \text{eGFR} < 60$ ); moderate ( $30 \leq \text{eGFR} < 45$ ); severe ( $\text{eGFR} < 30$ , not on dialysis); ESRD: on dialysis.

<sup>†</sup> Echocardiographic data were available in 2863 patients (88.8%).

<sup>‡</sup> Type of inserted stent included 1<sup>st</sup> generation (paclitaxel-eluting stent, sirolimus-eluting stent), 2<sup>nd</sup> generation (everolimus-eluting stent, zotarolimus-eluting stent, biolimus-eluting stent) and other (simultaneous use of 1<sup>st</sup> generation stent, 2<sup>nd</sup> generation stent or bare-metal stent).

AMI=acute myocardial infarction; CAD=coronary artery disease; CKD=chronic kidney disease; CR=complete revascularization; CTO=chronic total occlusion; CVA=cerebrovascular accident; eGFR=estimated glomerular filtration rate; ESRD=end stage renal disease; IR=incomplete revascularization; MI=myocardial infarction; NA, not applicable; LVEF=left ventricular ejection fraction; PCI=percutaneous coronary intervention; SMD=standardized mean difference.

**Supplementary Table 2. Details of Nonfatal Target-Vessel Myocardial Infarction at 3 Years According to Complete Revascularization and Chronic Kidney Disease.**

| <b>Non-CKD group</b>      | <b>Total patients<br/>(N=2295)</b> | <b>CR<br/>(N=647)</b> | <b>IR<br/>(N=1648)</b> | <b>P value</b> |
|---------------------------|------------------------------------|-----------------------|------------------------|----------------|
| Nonfatal target vessel MI | 25 (1.1%)                          | 8 (1.3%)              | 17 (1.1%)              | 0.620          |
| Stented segment           | 17 (0.8%)                          | 5 (0.9%)              | 12(0.8%)               | 0.846          |
| Denovo segment            | 8 (0.3%)                           | 3 (0.5%)              | 5 (0.3%)               | 0.540          |
| Unclassified              | 0                                  | 0                     | 0                      | NA             |
| <b>CKD group</b>          | <b>Total patients<br/>(N=929)</b>  | <b>CR<br/>(N=193)</b> | <b>IR<br/>(N=736)</b>  |                |
| Nonfatal target vessel MI | 17 (2.0%)                          | 7 (4.2%)              | 10 (1.4%)              | 0.018          |
| Stented segment           | 12 (1.4%)                          | 6 (3.2%)              | 6 (1.0%)               | 0.020          |
| Denovo segment            | 2 (0.3%)                           | 0                     | 2 (0.3%)               | 0.914          |
| Unclassified              | 3 (0.3%)                           | 1 (0.9%)              | 2 (0.2%)               | 0.376          |

Values are n/N%. The cumulative incidence of clinical outcomes are presented as Kaplan-Meier estimates at 3 years with IPTW adjusted sample, and p values are presented with Log-rank test.

CKD=chronic kidney disease; CR=complete revascularization; IR=incomplete revascularization; MI=myocardial infarction; NA, not applicable.

**Supplementary Table 3. Clinical Outcomes At 3 Years, According to Completeness of Revascularization in Patients with eGFR < 45 ml/min/1.73 m<sup>2</sup>**

|                           | <b>Total patients<br/>(N=403)</b> | <b>CR<br/>(N=84)</b> | <b>IR<br/>(N=319)</b> | <b>Unadjusted HR</b> | <b>Adjusted HR<sup>*</sup></b> | <b>P value</b> |
|---------------------------|-----------------------------------|----------------------|-----------------------|----------------------|--------------------------------|----------------|
| POCO                      | 171 (43.3%)                       | 48 (57.8%)           | 123 (39.5%)           | 1.67 (1.20-2.33)     | 1.57 (1.11-2.22)               | 0.010          |
| All-cause death           | 122 (31.2%)                       | 38 (45.9%)           | 84 (27.3%)            | 1.84 (1.26-2.70)     | 1.61 (1.09-2.38)               | 0.017          |
| Nonfatal MI               | 17 (5.0%)                         | 6 (9.6%)             | 11 (3.9%)             | 2.60 (0.97-7.00)     | 3.49 (1.20-10.16)              | 0.022          |
| Any revascularization     | 58 (17.0%)                        | 15 (21.5%)           | 43 (15.8%)            | 1.49 (0.83-2.63)     | 1.62 (0.88-2.98)               | 0.124          |
| SOCO                      | 96 (26.0%)                        | 26 (35.5%)           | 70 (23.8%)            | 1.54 (0.98-2.41)     | 1.38 (0.87-2.18)               | 0.174          |
| Cardiac death             | 69 (18.8%)                        | 19 (25.6%)           | 50 (17.2%)            | 1.48 (0.87-2.49)     | 1.18 (0.69-2.03)               | 0.540          |
| Nonfatal target vessel MI | 14 (4.2%)                         | 6 (9.6%)             | 8 (2.9%)              | 3.43 (1.20-9.79)     | 4.65 (1.48-14.60)              | 0.008          |
| TLR                       | 21 (6.1%)                         | 5 (7.7%)             | 16 (5.7%)             | 2.13 (0.85-5.34)     | 1.63 (0.58-4.55)               | 0.350          |

Values are n/N% or hazard ratio (95% confidential interval). The cumulative incidence of clinical outcomes are presented as Kaplan-Meier estimates at 3 years with IPTW adjusted sample. The p values are for adjusted HR and 95% confidence interval.

\* Adjusted HR was calculated by additional multivariate Cox regression analyses with clinically relevant covariates including age, sex, hypertension, diabetes mellitus, type of inserted stent, and clinical diagnosis.

CKD=chronic kidney disease; CR=complete revascularization; eGFR=estimated glomerular filtration rate; HR=hazard ratio; IR=incomplete revascularization; MI=myocardial infarction; POCO=patient-oriented composite outcome; SOCO=stent-oriented composite outcome; TLR=target lesion revascularization.

**Supplementary Table 4. Clinical Outcomes At 3 Years, According to Completeness of Revascularization in Patients with Chronic Kidney Disease and Treated Using Only 2<sup>nd</sup> Generation Drug-Eluting Stents.**

|                           | <b>Total patients<br/>(N=321)</b> | <b>CR<br/>(N=69)</b> | <b>IR<br/>(N=252)</b> | <b>Unadjusted HR</b> | <b>Adjusted HR*</b> | <b>P value</b> |
|---------------------------|-----------------------------------|----------------------|-----------------------|----------------------|---------------------|----------------|
| POCO                      | 87 (27.0%)                        | 20 (29.0%)           | 67 (26.5%)            | 1.11 (0.67-1.83)     | 1.07 (0.64-1.77)    | 0.800          |
| All-cause death           | 57 (17.8%)                        | 16 (23.2%)           | 41 (16.4%)            | 1.45 (0.81-2.60)     | 1.30 (0.73-2.34)    | 0.377          |
| Nonfatal MI               | 6 (2.1%)                          | 2 (3.9%)             | 4 (1.6%)              | 2.49 (0.47-13.27)    | 2.96 (0.52-16.73)   | 0.220          |
| Any revascularization     | 30 (10.4%)                        | 4 (6.2%)             | 26 (11.5%)            | 0.51 (0.17-1.53)     | 0.52 (0.17-1.58)    | 0.250          |
| SOCO                      | 42 (13.5%)                        | 10 (15.2%)           | 32 (13.1%)            | 1.19 (0.58-2.43)     | 1.14 (0.55-2.33)    | 0.729          |
| Cardiac death             | 31 (10.1%)                        | 6 (9.3%)             | 25 (10.3%)            | 0.93 (0.39-2.24)     | 0.85 (0.35-2.05)    | 0.712          |
| Nonfatal target vessel MI | 5 (1.8%)                          | 2 (3.9%)             | 3 (1.2%)              | 3.3 (0.56-19.62)     | 3.34 (0.55-20.33)   | 0.190          |
| TLR                       | 7 (2.2%)                          | 2 (3.4%)             | 5 (3.2%)              | 1.08 (0.17-6.96)     | 1.16 (0.17-7.66)    | 0.880          |

Values are n/N% or hazard ratio (95% confidential interval). The cumulative incidence of clinical outcome are presented as Kaplan-Meier estimates at 3 years with IPTW adjusted sample. The p values are for adjusted HR and 95% confidence interval.

\* Adjusted HR was calculated by additional multivariate Cox regression analyses with clinically relevant covariates including age, sex, hypertension, diabetes mellitus, type of inserted stent and clinical diagnosis.

CKD=chronic kidney disease; CR=complete revascularization; eGFR=estimated glomerular filtration rate; HR=hazard ratio; IR=incomplete revascularization; MI=myocardial infarction; POCO=patient-oriented composite outcome; SOCO=stent-oriented composite outcome; TLR=target lesion revascularization.

## Supplementary Figure Legends

### **Supplementary Figure 1. Clinical Outcomes According to Completeness of Revascularization in Patients with eGFR (ml/min/1.73m<sup>2</sup>) < 45.**

Among the patients with more advanced CKD, defined as eGFR (ml/min/1.73 m<sup>2</sup>) < 45, the significant hazard of angiographic CR was similar to the total CKD population. (A) Patient-oriented composite outcomes in more advanced CKD, and (B) stent-oriented composite outcomes in more advanced CKD. Multivariate adjusted hazard ratio (HR) with 95% confidence intervals (95% CI) and p values are presented.

CKD=chronic kidney disease; CR=complete revascularization; IR=incomplete revascularization.

### **Supplementary Figure 2. According to Completeness of Revascularization in Patients with Chronic Kidney Disease and Treated Using Only 2<sup>nd</sup> Generation Drug-Eluting Stents.**

The sensitivity analysis among patients who were revascularized using only 2<sup>nd</sup> generation drug-eluting stent showed similar trends with the original one, however, statistical significance was not reached. (A) Patient-oriented composite outcomes in CKD, and (B) stent-oriented composite outcomes in CKD. Multivariate adjusted hazard ratio (HR) with 95% confidence intervals (CI) and p values are presented.

CKD=chronic kidney disease; CR=complete revascularization; IR=incomplete revascularization.

**Supplementary Figure 1. Clinical Outcomes According to Completeness of Revascularization In Patients with eGFR (ml/min/1.73m<sup>2</sup>) < 45.**

**(A) Patient-Oriented Composite Outcomes in CKD**

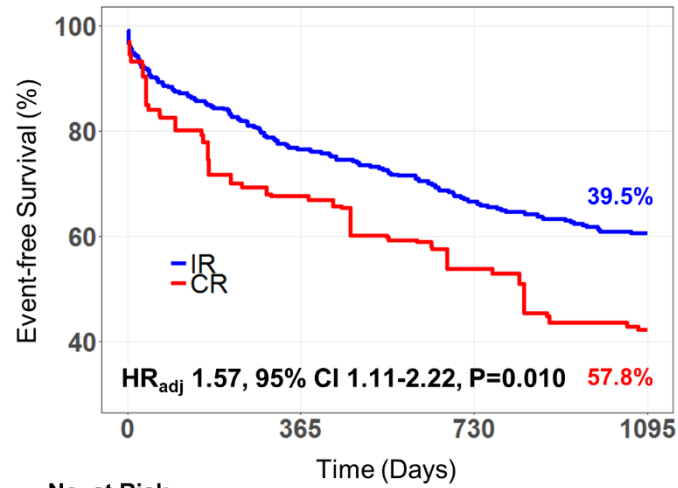

| No. at Risk |     |     |     |     |
|-------------|-----|-----|-----|-----|
| IR          | 319 | 244 | 212 | 185 |
| CR          | 84  | 57  | 45  | 31  |

**(B) Stent-Oriented Composite Outcomes in CKD**

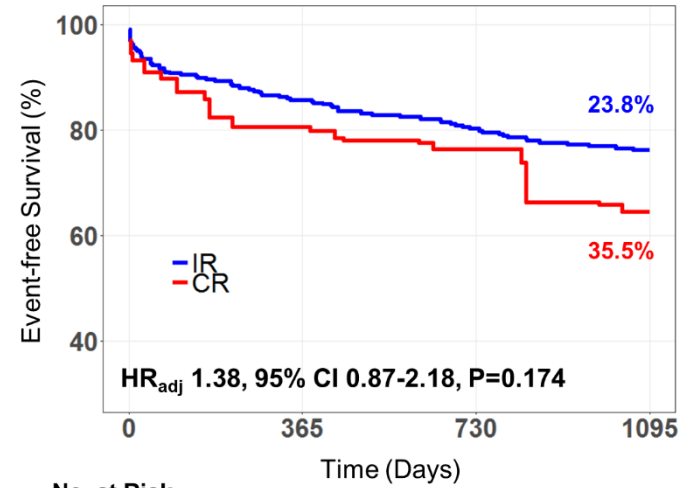

| No. at Risk |     |     |     |     |
|-------------|-----|-----|-----|-----|
| IR          | 319 | 260 | 232 | 203 |
| CR          | 84  | 59  | 48  | 34  |



**Supplementary Figure 2. Clinical Outcomes According to Completeness of Revascularization in Patients with Chronic Kidney Disease and Treated Using Only 2<sup>nd</sup> Generation Drug-eluting Stents.**

**(A) Patient-Oriented Composite Outcomes in CKD**

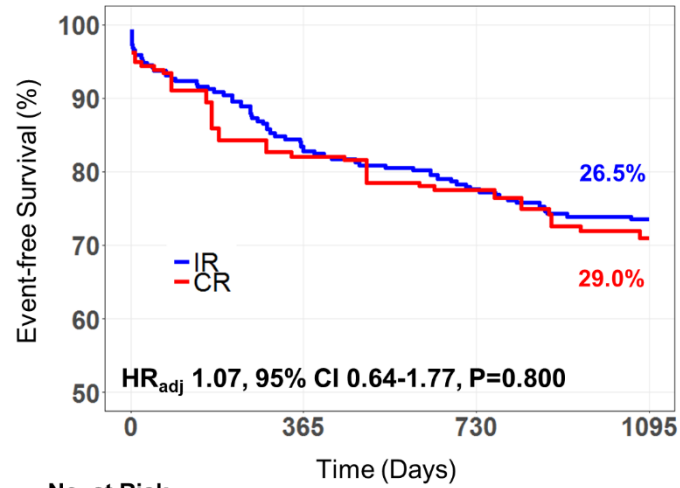

| No. at Risk |     |     |     |     |
|-------------|-----|-----|-----|-----|
| IR          | 252 | 210 | 196 | 162 |
| CR          | 69  | 57  | 54  | 39  |

**(B) Stent-Oriented Composite Outcomes in CKD**

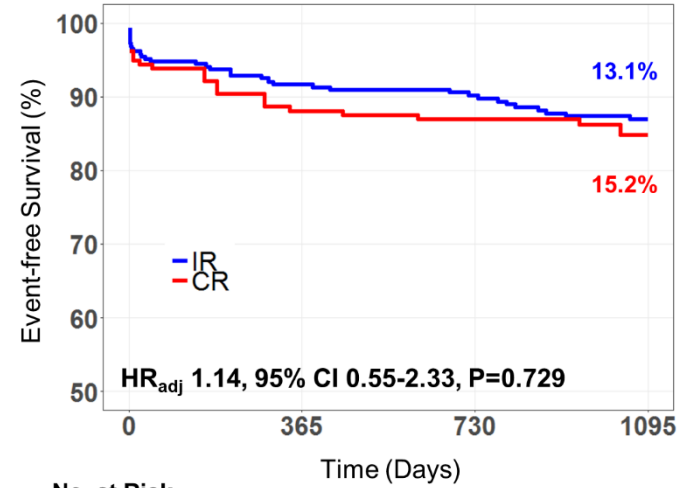

| No. at Risk |     |     |     |     |
|-------------|-----|-----|-----|-----|
| IR          | 252 | 223 | 214 | 177 |
| CR          | 69  | 57  | 54  | 39  |
